# Supplementary material
Source: PubMed Central journal article supplement (PMC5898229)
Supplement: NIHMS946662-supplement-Reading_List.pdf [file NIHMS946662-supplement-Reading_List.pdf]

**Table S1. Reading List**

*Speech in Steady State Noise*

Dubno JR, Ahlstrom JB, Horwitz AR. (2000) Use of context by young and aged adults with normal hearing. *J Acoust Soc Am* 107(1):538–546.

Hällgren M, Larsby B, Lyxell B, Arlinger S. (2001) Evaluation of a cognitive test battery in young and elderly normal-hearing and hearing-impaired persons. *J Am Acad Audiol* 12:357–370.

Humes LE, Burk MH, Coughlin MP, Busey TA, Strauser LE. (2007) Auditory speech recognition and visual text recognition in younger and older adults: similarities and differences between modalities and the effects of presentation rate. *J Speech Lang Hear Res* 50(2):283–303.

Van Rooij JCGM, Plomp R. (1989) Auditive and cognitive factors in speech perception by elderly listeners. I: Development of test battery. *J Acoust Soc Am* 86(4):1294–1309.

Van Rooij JCGM, Plomp R. (1990) Auditive and cognitive factors in speech perception by elderly listeners. II: Multivariate analyses. *J Acoust Soc Am* 88(6):2611–2624.

*Speech in Competing Speech*

Abel SM, Krever EM, Alberti PW. (1990) Auditory detection, discrimination and speech processing in aging, noise-sensitive and hearing-impaired listeners. *Scand Audiol* 19(1):43–54.

Dubno JR, Lee FS, Matthews LJ, Ahlstrom JB, Horwitz AR, Mills JH. (2008) Longitudinal changes in speech recognition in older persons. *J Acoust Soc Am* 123(1):462–475.

Dubno J, Lee F, Matthews L, Mills J. (1997) Age-related and gender-related changes in monaural speech recognition. *J Speech Hear Res* 40:444–452.

Gennis V, Garry PJ, Haaland KY, Yeo RA, Goodwin JS. (1991) Hearing and cognition in the elderly. *Arch Int Med* 151:2259–2264.

Humes LE, Lee JH, Coughlin MP. (2006) Auditory measures of selective and divided attention in young and older adults using single-talker competition. *J Acoust Soc Am* 120(5, Pt. 1):2926–2937.

Murphy DR, Daneman M, Schneider BA. (2006) Why do older adults have difficulty following conversations? *Psychol Aging* 21(1):49–61.

Murphy DR, McDowd JM, Wilcox KA. (1999) Inhibition and aging: similarities between younger and older adults as revealed by the processing of unattended auditory information. *Psychol Aging* 14(1):44–59.

Pichora-Fuller MK, Schneider BA, Daneman M. (1995) How young and old adults listen to and remember speech in noise. *J Acoust Soc Am* 97(1):593–608.

Schum DJ, Matthews LJ. (1992) SPIN test performance of elderly hearing-impaired listeners. *J Am Acad Audiol* 3(5):303–307.

Snell KB, Mapes FM, Hickman ED, Frisina DR. (2002) Word recognition in competing babble and the effects of age, temporal processing, and absolute sensitivity. *J Acoust Soc Am* 112(2):720–727.

Souza PE, Turner CW. (1994) Masking of speech in young and elderly listeners with hearing loss. *J Speech Hear Res* 37:655–661.

Wiley TL, Cruickshanks KJ, Nondahl DM, Tweed TS, Klein R, Klein BEK. (1998) Aging and word recognition in competing message. *J Am Acad Audiol* 9(3):191–198.

### *Speech: Informational Masking*

Sommers MS. (1997) Stimulus variability and spoken word recognition. II. The effects of age and hearing impairment. *J Acoust Soc Am* 101(4):2278–2288.

### *Speech: Binaural Advantage*

Dubno JR, Ahlstrom JB, Horwitz AR. (2008) Binaural advantage for younger and older adults with normal hearing. *J Speech Lang Hear Res* 51:539–556.

Dubno JR, Horwitz AR, Ahlstrom JB. (2002) Benefit of modulated maskers for speech recognition by younger and older adults with normal hearing. *J Acoust Soc Am* 111(6):2897–2907.

Helfer KS. (1992) Aging and the binaural advantage in reverberation and noise. *J Speech Hear Res* 35(6):1394–1401.

### *Speech: Dichotic Listening*

Humes LE, Lee JH, Coughlin MP. (2006) Auditory measures of selective and divided attention in young and older adults using single-talker competition. *J Acoust Soc Am* 120(5, Pt. 1):2926–2937.

Jerger J, Chmiel R, Allen J, Wilson A. (1994) Effects of age and gender on dichotic sentence identification. *Ear Hear* 15(4):274–286.

Martini A, Bovo R, Agnoletto M, et al. (1988) Dichotic performance in elderly Italians with Italian stop consonant-vowel stimuli. *Audiology* 27(1):1–7.

Noffsinger D, Martinez CD, Andrews M. (1996) Dichotic listening to speech: VA-CD data from elderly subjects. *J Am Acad Audiol* 7(1):49–56.

Roup C, Wiley T, Wilson R. (2006) Dichotic word recognition in young and older adults. *J Am Acad Audiol* 17:230–240.

Wilson RH, Jaffe MS. (1996) Interactions of age, ear, and stimulus complexity on dichotic digit recognition. *J Am Acad Audiol* 7(5):358–364.

### *Speech: Time-Compressed Speech*

- Gordon-Salant S, Fitzgibbons PJ. (1993) Temporal factors and speech recognition performance in young and elderly listeners. *J Speech Hear Res* 36:1276–1285.
- Gordon-Salant S, Fitzgibbons PJ. (2004) Effects of stimulus and noise rate variability on speech perception by younger and older adults. *J Acoust Soc Am* 115(4):1808–1817.
- Humes LE, Burk MH, Coughlin MP, Busey TA, Strauser LE. (2007) Auditory speech recognition and visual text recognition in younger and older adults: similarities and differences between modalities and the effects of presentation rate. *J Speech Lang Hear Res* 50(2):283–303.
- Jenstad LM, Souza PE. (2007) Temporal envelope changes of compression and speech rate: combined effects on recognition for older adults. *J Speech Lang Hear Res* 50(5):1123–1138.
- Letowski T, Poch N. (1996) Comprehension of time-compressed speech: effects of age and speech complexity. *J Am Acad Audiol* 7(6):447–457.
- Schneider BA, Daneman M, Murphy DR. (2005) Speech comprehension difficulties in older adults: cognitive slowing or age-related changes in hearing? *Psychol Aging* 20(2):261–271.
- Stollman MH, Kapteyn TS. (1994) Effect of time scale modification of speech on the speech recognition threshold in noise for elderly listeners. *Audiology* 33(5):280–290.
- Tun PA. (1998) Fast noisy speech: age differences in processing rapid speech with background noise. *Psychol Aging* 13(3):424–434.
- Vaughan NE, Letowski T. (1997) Effects of age, speech rate, and type of test on temporal auditory processing. *J Speech Lang Hear Res* 40(5):1192–1200.
- Versfeld NJ, Dreschler WA. (2002) The relationship between the intelligibility of time-compressed speech and speech in noise in young and elderly listeners. *J Acoust Soc Am* 111(1, Pt. 1):401–408.
- Wingfield A, McCoy SL, Peelle JE, Tun PA, Cox LC. (2006) Effects of adult aging and hearing loss on comprehension of rapid speech varying in syntactic complexity. *J Am Acad Audiol* 17(7):487–497.

### *Speech: Reverberant Speech*

- Halling DC, Humes LE. (2000) Factors affecting the recognition of reverberant speech by elderly listeners. *J Speech Hear Res* 43:414–431.
- Humes L, Christopherson L. (1991) Speech identification difficulties of hearing-impaired elderly persons: the contributions of auditory processing deficits. *J Speech Hear Res* 34:686–693.
- Helfer KS, Huntley RA. (1991) Aging and consonant errors in reverberation and noise. *J Acoust Soc Am* 90(4, Pt. 1):1786–1796.
- Helfer K, Wilbur L. (1990) Hearing loss, aging, and speech perception in reverberation and noise. *J Speech Hear Res* 33:149–155.

### *Speech: Speech in Fluctuating Noise*

Dubno JR, Horwitz AR, Ahlstrom JB. (2002) Benefit of modulated maskers for speech recognition by younger and older adults with normal hearing. *J Acoust Soc Am* 111(6):2897–2907.

Larsby B, Hällgren M, Lyxell B, Arlinger S. (2005) Cognitive performance and perceived effort in speech processing tasks: effects of different noise backgrounds in normal-hearing and hearing-impaired subjects. *Int J Audiol* 44:131–143.

### *Speech: Other*

Bryan J, Luszcz MA. (2000) Measurement of executive function: considerations for detecting adult age differences. *J Clin Exp Neuropsychol* 22(1):40–55.

Chmiel R, Jerger J. (1996) Hearing aid use, central auditory disorder, and hearing handicap in elderly persons. *J Am Acad Audiol* 7:190–202.

Craig CH, Kim BW, Rhyner PMP, Chirillo TKB. (1993) Effects of word predictability, child development, and aging on time-gated speech recognition performance. *J Speech Hear Res* 36(4):832–841.

Crawford JR, Bryan J, Luszcz MA, Obonsawin MC, Stewart L. (2000) The executive decline hypothesis of cognitive aging: do executive deficits qualify as differential deficits and do they mediate age-related memory decline? *Aging Neuropsychol Cogn* 7(1):9–31.

Darowski ES, Helder E, Zacks RT, Hasher L, Hambrick DZ. (2008) Age-Related Differences in Cognition: The Role of Distraction Control. *Neuropsychology* 22:638–644.

Fogerty D, Humes LE, Kewley-Port D. (2010) Auditory temporal-order processing of vowel sequences by young and elderly listeners. *J Acoust Soc Am* 127(4):2509–2520.

Foo C, Rudner M, Rönnerberg J, Lunner T. (2007) Recognition of speech in noise with new hearing instrument compression release settings requires explicit cognitive storage and processing capacity. *J Am Acad Audiol* 18:618–631.

Gatehouse S, Naylor G, Elberling C. (2006) Linear and non-linear hearing aid fittings—1. Patterns of benefit. *Int J Audiol* 45:130–152.

Gatehouse S, Naylor G, Elberling C. (2006) Linear and non-linear hearing aid fittings—2. Patterns of candidature. *Int J Audiol* 45:153–171.

Golomb JD, Peelle JE, Wingfield A. (2007) Effects of stimulus variability and adult aging on adaptation to time-compressed speech. *J Acoust Soc Am* 121(3):1701–1708.

George ELJ, Zekveld AA, Kramer SE, Goverts T, Festen JM, Houtgast T. (2007) Auditory and nonauditory factors affecting speech reception in noise by older listeners. *J Acoust Soc Am* 121(4):2362–2375.

Grose JH, Hall JW, III, Buss E. (2006) Temporal processing deficits in the pre-senescent auditory system. *J Acoust Soc Am* 119:2305–2315.

Humes LE. (2002) Factors underlying the speech-recognition performance of elderly hearing-aid wearers. *J Acoust Soc Am* 112(3, Pt. 1):1112–1132.

- Humes LE, Nelson KJ, Pisoni DB, Lively SE. (1993) Effects of age on serial recall of natural and synthetic speech. *J Speech Hear Res* 36(3):634–639.
- Lister J, Tarver K. (2004) Effect of age on silent gap discrimination in synthetic speech stimuli. *J Speech Lang Hear Res* 47(2):257–268.
- Lunner T. (2003) Cognitive function in relation to hearing aid use. *Int J Audiol* 42:S49–S58.
- Lunner T, Sundewall-Thorén E. (2007) Interactions between cognition, compression, and listening conditions: effects on speech-in-noise performance in a two-channel hearing aid. *J Am Acad Audiol* 18:604–617.
- Marshall NB, Duke LW, Walley AC. (1996) Effects of age and Alzheimer's disease on recognition of gated spoken words. *J Speech Hear Res* 39(4):724–733.
- McCoy S, Tun P, Cox L, Colangelo M, Stewart R, Wingfield A. (2005) Hearing loss and perceptual effort: downstream effects on older adults' memory for speech. *Q J Exp Psychol A* 58A(1):22–33.
- Murphy D, Craik F, Li K, Schneider B. (2000) Comparing the effects of aging and background noise of short-term memory performance. *Psychol Aging* 15(2):323–334.
- Salthouse TA, Atkinson TM, Berish DE. (2003) Executive functioning as a potential mediator of age-related cognitive decline in normal adults. *J Exp Psychol Gen* 132(4):566–594.
- Souza PE. (2000) Older listeners' use of temporal cues altered by compression amplification. *J Speech Lang Hear Res* 43(3):661–674.
- Souza PE, Boike KT, Witherell K, Tremblay K. (2007) Prediction of speech recognition from audibility in older listeners with hearing loss: effects of age, amplification, and background noise. *J Am Acad Audiol* 18:54–65.
- Tun PA, McCoy S, Wingfield A. (2009) Aging, hearing acuity, and the attentional costs of effortful listening. *Psychol Aging* 24(3):761–766.
- Van Boxtel MPJ, van Beijsterveldt CEM, Houx PJ, Anteunis LJC, Metsemakers JFM, Jolles J. (2000). Mild hearing impairment can reduce verbal memory performance in a healthy adult population. *J Clin Exp Neuropsychol* 22(1):147–154.
- Wingfield A, Alexander A, Cavigelli S. (1994) Does memory constrain utilization of top-down information in spoken word recognition? Evidence from normal aging. *Lang Speech* 37(3):221–235.
- Wingfield A, Lindfield KC, Goodglass H. (2000) Effects of age and hearing sensitivity on the use of prosodic information in spoken word recognition. *J Speech Lang Hear Res* 43(4):915–925.
- Yonan CA, Sommers MS. (2000) The effects of talker familiarity on spoken word identification in younger and older listeners. *Psychol Aging* 15(1):88–99.

*Nonspeech: Gap Detection*

- Bertoli S, Smurzynski J, Probst R. (2002) Temporal resolution in young and elderly subjects as measured by mismatch negativity and a psychoacoustic gap detection task. *Clin Neurophysiol* 113:396–406.
- Harris KC, Eckert MA, Ahlstrom JB, Dubno JR. (2010) Age-related differences in gap detection: effects of task difficulty and cognitive ability. *Hear Res* 264(1–2):21–29.
- He N, Horwitz AR, Dubno JR, Mills JH. (1999) Psychometric functions for gap detection in noise measured from young and aged subjects. *J Acoust Soc Am* 106(2):966–978.
- Humes LE, Busey TA, Craig JC, Kewley-Port D. (2009) The effects of age on sensory thresholds and temporal gap detection in hearing, vision and touch. *Atten Percept Psychophys* 71:860–871.
- Humes LE, Kewley-Port D, Fogerty D, Kinney D. (2010) Measures of hearing threshold and temporal processing across the adult lifespan. *Hear Res* 264:30–40.
- Moore BCJ, Peters RW, Glasberg BR. (1992) Detection of temporal gaps in sinusoids by elderly subjects with and without hearing loss. *J Acoust Soc Am* 92:1923–1932.
- Phillips SL, Gordon-Salant S, Fitzgibbons PJ, Yeni-Komshian G. (2000) Frequency and temporal resolution in elderly listeners with good and poor word recognition. *J Speech Lang Hear Res* 43:217–228.
- Pichora-Fuller MK, Schneider BA, Benson NJ, Hamstra SG, Storzer E. (2006). Effect of age on detection of gaps in speech and nonspeech markers varying in duration and spectral symmetry. *J Acoust Soc Am* 119:1143–1155.
- Schneider BA, Hamstra SJ. (1999) Gap detection thresholds as function of tonal duration for younger and older listeners. *J Acoust Soc Am* 106:371–379.
- Schneider BA, Pichora-Fuller MK, Kowalchuk D, Lamb M. (1994) Gap detection and the precedence effect in young and old adults. *J Acoust Soc Am* 95(2):980–991.
- Schneider B, Speranza F, Pichora-Fuller MK. (1998) Age-related changes in temporal resolution: envelope and intensity effects. *Can J Exp Psychol* 52(4):184–191.
- Snell KB. (1997) Age-related changes in temporal gap detection. *J Acoust Soc Am* 101:2214–2220.
- Snell KB, Frisina DR. (2000) Relationships among age-related differences in gap detection and word recognition. *J Acoust Soc Am* 107:1615–1626.
- Snell KB, Hu HL. (1999) The effect of temporal placement on gap detectability. *J Acoust Soc Am* 106(6):3571–3577.
- Strouse A, Ashmead DH, Ohde RN, Grantham DW. (1998) Temporal processing in the aging auditory system. *J Acoust Soc Am* 104(4):2385–2399.

### *Nonspeech: Temporal Masking*

- Dubno JR, Horwitz AR, Ahlstrom JB. (2003) Recovery from prior stimulation: masking of speech by interrupted noise for younger and older adults with normal hearing. *J Acoust Soc Am* 113(4, Pt. 1):2084–2094.

Gehr S, Sommers M. (1999) Age differences in backward masking. *J Acoust Soc Am* 106:2793–2799.

Gifford R, Bacon S, Williams E. (2007) An examination of speech recognition in a modulated background and of forward masking in younger and older listeners. *J Speech Lang Hear Res* 50:857–864.

#### *Nonspeech: Temporal Order*

Fitzgibbons PJ, Gordon-Salant S. (1998) Auditory temporal order perception in younger and older adults. *J Speech Lang Hear Res* 41:1052–1060.

Fitzgibbons PJ, Gordon-Salant S. (2006) Effects of age and sequence presentation rate on temporal order recognition. *J Acoust Soc Am* 120:991–999.

Humes L, Christopherson L. (1991) Speech identification difficulties of hearing-impaired elderly persons: the contributions of auditory processing deficits. *J Speech Hear Res* 34:686–693.

Shrivastav MN, Humes LE, Aylsworth L. (2008) Temporal-order discrimination of tonal sequences by younger and older adults: the role of duration and rate. *J Acoust Soc Am* 124:462–471.

Trainor LJ, Trehub SE. (1989) Aging and auditory temporal sequencing: ordering the elements of repeating tone patterns. *Percept Psychophys* 45(5):417–426.

#### *Nonspeech: Duration/Gap Discrimination*

Lister J, Besing J, Koehnke J. (2002) Effects of age and frequency disparity on gap discrimination. *J Acoust Soc Am* 111(6):2793–2800.

Fitzgibbons PJ, Gordon-Salant S. (1994) Age effects on measures of auditory duration discrimination. *J Speech Hear Res* 37:662–670.

Fitzgibbons PJ, Gordon-Salant S. (1995) Age effects on duration discrimination with simple and complex stimuli. *J Acoust Soc Am* 98:3140–3145.

Fitzgibbons PJ, Gordon-Salant S. (2001) Aging and temporal discrimination in auditory sequences. *J Acoust Soc Am* 109(6):2955–2963.

Fitzgibbons PJ, Gordon-Salant S. (2004) Age effects on discrimination of timing in auditory sequences. *J Acoust Soc Am* 116(2):1126–1134.

Fitzgibbons PJ, Gordon-Salant S, Barrett J. (2007) Age-related differences in discrimination of an interval separating onsets of successive tone bursts as a function of interval duration. *J Acoust Soc Am* 122:458–466.

#### *Nonspeech: Other*

Abel SM, Giguère C, Consoli A, Papsin BC. (2000) The effect of aging on horizontal plane sound localization. *J Acoust Soc Am* 108:743–752.

He N, Dubno JR, Mills JH. (1998) Frequency and intensity discrimination measured in a maximum-likelihood procedure from young and aged normal-hearing subjects. *J Acoust Soc Am* 103(1):553–565.

Moore BCJ, Peters RW. (1992) Pitch discrimination and phase sensitivity in young and elderly subjects and its relationship to frequency selectivity. *J Acoust Soc Am* 91:2881–2893.

Murphy DR, Schneider BA, Speranza F, Moraglia G. (2006) A comparison of higher order auditory processes in younger and older adults. *Psychol Aging* 21(4):763–773.

Neher T, Behrens T, Carlile S, Jin C, Kragelund L, Petersen AS, van Schaik A. (2009) Benefit from spatial separation of multiple talkers in bilateral hearing-aid users: effects of hearing loss, age, and cognition. *Int J Audiol* 48:758–774.

Neils J, Newman CW, et al. (1991) The effects of rate, sequencing, and memory on auditory processing in the elderly. *J Gerontol* 46(2):P71–75.

Takahashi GA, Bacon SP. (1992) Modulation detection, modulation masking, and speech understanding in noise in the elderly. *J Speech Hear Res* 35(6):1410–1421.

#### *Test-Battery Studies*

Cooper JC, Jr, Gates GA. (1991) Hearing in the elderly—the Framingham cohort, 1983–1985: Part II. Prevalence of central auditory processing disorders. *Ear Hear* 12:304–311.

Cox LC, McCoy SL, Tun PA, Wingfield A. (2008) Monotic auditory processing disorder tests in the older adult population. *J Am Acad Audiol* 19:293–308.

Divenyi PL, Haupt KM. (1997) Audiological correlates of speech understanding deficits in elderly listeners with mild-to-moderate hearing loss. I. Age and lateral asymmetry effects. *Ear Hear* 18(1):42–61.

Divenyi PL, Haupt KM. (1997) Audiological correlates of speech understanding deficits in elderly listeners with mild-to-moderate hearing loss. II. Correlation analysis. *Ear Hear* 18(2):100–113.

Divenyi PL, Haupt KM. (1997) Audiological correlates of speech understanding deficits in elderly listeners with mild-to-moderate hearing loss. III. Factor representation. *Ear Hear* 18(3):189–201.

Dubno J, Lee F, Matthews L, Mills J. (1997) Age-related and gender-related changes in monaural speech recognition. *J Speech Hear Res* 40:444–452.

Gates GA, Anderson ML, Feeney MP, McCurry SM, Larson EB. (2008) Central auditory dysfunction in older persons with memory impairment or Alzheimer dementia. *Arch Otolaryngol Head Neck Surg* 134(7):771–777.

Gates GA, Feeney MP, Mills D. (2008) Cross-sectional age-changes of hearing in the elderly. *Ear Hear* 29(6):865–874.

Gates GA, Gibbons LE, McCurry SM, Crane PK, Feeney MP, Larson EB. (2010) Executive dysfunction and presbycusis in older persons with and without memory loss and dementia. *Cogn Behav Neurol* 23(4):218–223.



- Golding M, Taylor A, Cupples L, Mitchell P. (2006) Odds of demonstrating auditory processing abnormality in the average older adult: the Blue Mountains Hearing Study. *Ear Hear* 27:129–138.
- Humes LE. (2005) Do 'Auditory Processing' Tests Measure Auditory Processing in the Elderly? *Ear Hear* 26:109–119.
- Humes LE, Coughlin M, Talley L. (1996) Evaluation of the use of a new compact disc for auditory perceptual assessment in the elderly. *J Am Acad Audiol* 7:419–427.
- Humes LE, Watson BU, Christensen LA, Cokely CA, Halling DA, Lee L. (1994) Factors associated with individual differences in clinical measures of speech recognition among the elderly. *J Speech Hear Res* 37:465–474.
- Jerger J, Chmiel R. (1997) Factor analytic structure of auditory impairment in elderly persons. *J Am Acad Audiol* 8:269–276.
- Jerger J, Jerger S, Oliver T, Pirozzolo F. (1989) Speech understanding in the elderly. *Ear Hear* 10:79–89.
- Jerger J, Jerger S, Pirozzolo F. (1991) Correlational analysis of speech audiometric scores, hearing loss, age and cognitive abilities in the elderly. *Ear Hear* 12:103–109.
- Stach B, Spretnjak M, Jerger J. (1990) The prevalence of central presbycusis in a clinical population. *J Am Acad Audiol* 1:109–115.
- Van Rooij JCGM, Plomp R. (1992) Auditive and cognitive factors in speech perception by elderly listeners. III: Additional data and final discussion. *J Acoust Soc Am* 91(2):1028–1033.
- Vaughan N, Storzbach D, Furukawa I. (2006) Sequencing versus nonsequencing working memory in understanding of rapid speech by older listeners. *J Am Acad Audiol* 17(7):506–518.
- Vaughan N, Storzbach D, Furukawa I. (2008) Investigation of potential cognitive tests for use with older adults in audiology clinics. *J Am Acad Audiol* 19:533–541.

#### *Anatomy and Imaging Studies*

- Chance SA, Casanova MF, Switala AE, Crow TJ, Esiri MM. (2006) Minicolumn thinning in temporal lobe association cortex but not primary auditory cortex in normal human aging. *Acta Neuropathol* 111(5):459–464.
- Eckert MA, Walczak A, Ahlstrom J, Denslow S, Horwitz A, Dubno JR. (2008) Age-related effects on word recognition: reliance on cognitive control systems with structural declines in speech-responsive cortex. *J Assoc Res Otolaryngol* 9:252–259.
- Gootjes L, Van Strien JW, Bouma A. (2004) Age effects in identifying and localising dichotic stimuli: a corpus callosum deficit? *J Clin Exp Neuropsychol* 26(6):826–837.
- Grady CL, Yu H, Alain C. (2008) Age-related differences in brain activity underlying working memory for spatial and nonspatial auditory information. *Cereb Cortex* 18:189–199.
- Harris KC, Dubno JR, Keren NI, Ahlstrom JB, Eckert MA. (2009) Speech recognition in younger and older adults: a dependency on low-level auditory cortex. *J Neurosci* 29(19):6078–6087.

- Jacobs B, Scheibel A. (1993) A quantitative dendritic analysis of Wernicke's area in humans. I. Lifespan changes. *J Comp Neurol* 327:83–96.
- Mahncke HW, Bronstone A, Merzenich MM. (2006) Brain plasticity and functional losses in the aged: scientific bases for a novel intervention. *Prog Brain Res* 157:81–109.
- Sharp DJ, Scott SK, Mehta MA, Wise RJS. (2006) The neural correlates of declining performance with age: evidence for age-related changes in cognitive control. *Cerebral Cortex* 16:1739–1749.
- Sinha UK, Hollen KM, Rodriguez R, Miller CA. (1993) Auditory system degeneration in Alzheimer's disease. *Neurology* 43:779–785.
- Sinha UK, Saadat D, Linthicum FH, Jr, Hollen KM, Miller CA. (1996) Temporal bone findings in Alzheimer's disease. *Laryngoscope* 106:1–5.
- Wong PCM, Jin JX, Gunasekera GM, Abel R, Lee ER, Dhar S. (2009) Aging and cortical mechanisms of speech perception in noise. *Neuropsychologia* 47:693–703.

#### *Electrophysiology Studies*

- Alain C, Tremblay K. (2007) The role of event-related brain potentials in assessing central auditory processing. *J Am Acad Audiol* 18:573–589.
- Amenedo E, Diaz F. (1998) Aging-related changes in processing of non-target and target stimuli during an auditory oddball task. *Biol Psychol* 48:235–267.
- Amenedo E, Diaz F. (1999) Ageing-related changes in the processing of attended and unattended standard stimuli. *Neuroreport* 10:2383–2388.
- Anderer P, Semlitsch H, Saletu B. (1996) Multi-channel auditory event related brain potentials: effects of normal aging on the scalp distribution of N1, P2, N2, and P300 latencies and amplitudes. *Electroencephalogr Clin Neurophysiol* 99:458–472.
- Bertoli S, Smurzynski J, Probst R. (2005) Effects of age, age-related hearing loss, and contralateral cafeteria noise on the discrimination of small frequency changes: psychoacoustic and electrophysiological measures. *J Assoc Res Otolaryngol* 6:207–222.
- Boettcher FA. (2002) Presbycusis and the auditory brainstem response. *J Speech Lang Hear Res* 45(6):1249–1261.
- Boettcher FA, Madhotra D, Poth EA, Mills JH. (2002) The frequency-modulation following response in young and aged human subjects. *Hear Res* 165(1–2):10–18.
- Boettcher FA, Poth EA, Mills JH, Dubno JR. (2001) The amplitude-modulation following response in young and aged human subjects. *Hear Res* 153(1–2):32–42.
- Burkard RF, Sims D. (2001) The human auditory brainstem response to high click rates: aging effects. *Am J Audiol* 10(2):53–61.
- Burkard RF, Sims D. (2002) A comparison of the effects of broadband masking noise on the auditory brainstem response in young and older adults. *Am J Audiol* 11(1):13–22.
- Ford J, Pfefferbaum A. (1991) Event-related potentials and eyeblink responses in automatic and controlled processing: effects of age. *Electroencephalogr Clin Neurophysiol* 78:361–377.

- Harris KC, Mills JH, Dubno JR. (2007) Electrophysiologic correlates of intensity discrimination in cortical evoked potentials of younger and older adults. *Hear Res* 228:58–68.
- Harris KC, Mills JH, He NJ, Dubno JR. (2008) Age-related differences in sensitivity to small changes in frequency assessed with cortical evoked potentials. *Hear Res* 243:47–56.
- Iragui V, Kutas M, Mitchiner M, Hillyard S. (1993) Effects of aging on event-related brain potentials and reaction times in an auditory oddball task. *Psychophysiology* 30:10–22.
- Leigh-Paffenroth ED, Fowler CG. (2006) Amplitude-modulated auditory steady-state responses in younger and older listeners. *J Am Acad Audiol* 17(8):582–597.
- Poth EA, Boettcher FA, Mills JH, Dubno JR. (2001) Auditory brainstem responses in younger and older adults for broadband noises separated by a silent gap. *Hear Res* 161:81–86.
- Ross B, Fujioka T, Tremblay KL, Picton TW. (2007) Aging in binaural hearing begins in mid-life: evidence from cortical auditory-evoked responses to changes in interaural phase. *J Neurosci* 27:11172–11178.
- Tremblay K, Billings C, Rohila N. (2004) Speech evoked cortical potentials: effects of age and stimulus presentation rate. *J Am Acad Audiol* 15:226–237.
- Tremblay KL, Piskosz M, Souza P. (2002) Aging alters the neural representation of speech cues. *Neuroreport* 13:1865–1870.
- Tremblay KL, Piskosz M, Souza P. (2003) Effects of age and age-related hearing loss on the neural representation of speech cues. *Clin Neurophysiol* 114:1332–1343.
- Walton JP, Simon H, Frisina RD. (2002) Age-related alterations in the neural coding of envelope periodicities. *J Neurophysiol* 88(2):565–578.
- Woods D. (1992) Auditory selective attention in middle-aged and elderly subjects: an event-related brain potential study. *Electroencephalogr Clin Neurophysiol* 84:456–468.
